# Supplementary material for: Effect of changes in the fractal structure of a littoral zone in the course of lake succession on the abundance, body size sequence and biomass of beetles
Source: PeerJ. 2018 Sep 26;6:e5662. doi: 10.7717/peerj.5662 (PMC6163033; doi:10.7717/peerj.5662)
Supplement: Appendix S1 — %—contribution in the littoral zone (Sm, Sphagnum mat; Di, Sparse macrophytes; De, Dense macrophytes; A, sandy bottom); T, Stage of succession (O, oligohumic, M, mesohumic; P, polyhumic), S, number of species. [file peerj-06-5662-s001.docx]

Appendix 1 **General characteristics of the lakes.** % – contribution in the littoral zone (Sm – *Sphagnum* mat, Di – Sparse macrophytes, De - Dense macrophytes, A – sandy bottom), T – Stage of succession (O – oligohumic, M – mesohumic, P – polyhumic), S – number of species.

| **Lake** | **Geographic N** | **Coordinates E** | **Area (ha)** | **Cover mat**  **(%)** | | **%** | | | | **T** | **S** |
| --- | --- | --- | --- | --- | --- | --- | --- | --- | --- | --- | --- |
| **Sm** | **Di** | **De** | **A** |
| Bobrówko | 53°45’02’’ | 21°31’11’’ | 1.30 | 40 | 0.9 | | 0.1 | –­­ | – | P | 3 |
| Borkowskie | 53°43’29’’ | 21°32’89’’ | 2.70 | 37 | 0.9 | | 0.1 | – | – | P | 6 |
| Babionek Duży | 53°55’30’’ | 17°33’13’’ | 2.00 | 37 | 0.9 | | 0.1 | – | – | P | 12 |
| Babionek Mały | 53°55’20’’ | 17°33’02’’ | 1.70 | 5 | 0.9 | | 0.1 | – | – | M | 7 |
| Białe | 53°53’29’’ | 20°49’21’’ | 2.88 | 3 | 0.8 | | 0.1 | 0.1 | – | M | 33 |
| Czarne | 53°54’42’’ | 17°30’49’’ | 11.00 | 2 | 0.6 | | 0.1 | 0.1 | 0.2 | O | 33 |
| Długie | 53°48’29’’ | 17°37’10’’ | 6.20 | 3 | 0.1 | | 0.7 | – | 0.2 | O–M | 33 |
| Gryżewskie | 53°43’39’’ | 21°32’48’’ | 4.0 | 42 | 0.5 | | 0.1 | 0.4 | 0.1 | M | 6 |
| Krucze Oko | 53°39’33’’ | 21°24’11’’ | 0.4 | 35 | 0.9 | | 0.1 | – | – | P | 1 |
| Kruczy Staw | 53°39’30’’ | 21°24’14’’ | 2.08 | 15 | 0.9 | | 0.1 | – | – | M–P | 4 |
| Kruczy Stawek | 53°39’38’’ | 21°24’12’’ | 0.50 | 40 | 0.9 | | 0.1 | – | – | P | 5 |
| Jonkowo | 53°48’49’’ | 20°19’05’’ | 2.95 | 20 | 0.8 | | 0.1 | 0.1 | – | M–P | 19 |
| Klimontek | 53°42’21’’ | 21°26’07’’ | 0.40 | 10 | 0.8 | | 0.1 | – | 0.1 | M–P | 13 |
| Kociołek | 53°54’01’’ | 20°49’11’’ | 0.56 | 5 | 0.9 | | 0.1 | – | – | M | 19 |
| Kruczek Duży | 53°39’33’’ | 21°24’11’’ | 4.24 | 20 | 0.9 | | 0.1 | – | – | M–P | 3 |
| Kruczek Mały | 53°39’27’’ | 21°25’01’’ | 2.56 | 10 | 0.9 | | 0.1 | – | – | M–P | 13 |
| Krypko | 54°31’57’’ | 18°14’21’’ | 5.16 | 39 | 0.8 | | 0.2 | – | – | P | 11 |
| Małe Gacno | 53°47’07’’ | 17°33’01’’ | 17.50 | 2 | 0.1 | | 0.7 | – | 0.2 | O | 11 |
| Małe Łowne | 53°48’10’’ | 17°27’29’’ | 2.50 | 11 | 0.2 | | 0.7 | – | 0.1 | M | 9 |
| Moczadło | 53°48’47’’ | 17°37’57’’ | 3.60 | 1 | 0.05 | | 0.8 | 0.05 | 0.1 | O | 36 |
| Motylek | 53°40’16’’ | 20°05’46’’ | 3.30 | 39 | 0.8 | | 0.2 | – | – | P | 27 |
| Nierybno | 53°49’23’’ | 17°33’47’’ | 11.00 | 2.9 | 0.1 | | 0.8 | 0.1 | – | O | 37 |
| Pałsznik | 54°31’59’’ | 18°14’21’’ | 9.70 | 33 | 0.7 | | 0.2 | – | 0.1 | P | 7 |
| Piecki | 53°54’44’’ | 17°33’17’’ | 6.00 | 11 | 0.3 | | 0.3 | 0.1 | 0.3 | O–M | 4 |
| Purdka | 53°48’49’’ | 20°19’05’’ | 1.61 | 43 | 0. 8 | | 0.1 | 0.1 | – | P | 30 |
| Skarp | 53°38’09’’ | 21°27’42’’ | 13.0 | 1 | 0.1 | | 0.6 | 0.3 | – | O | 10 |
| Sosnówek | 53°48’59’’ | 17°36’58’’ | 3.50 | 2 | 0.05 | | 0.8 | 0.05 | 0.1 | O | 34 |
| Suchar 1 | 54°05’07’’ | 23°00’54’’ | 1.12 | 31 | 0.8 | | 0.2 | – | – | P | 30 |
| Suchar 2 | 54°05’13’’ | 23°01’03’’ | 2.60 | 32 | 0.8 | | 0.1 | – | 0.1 | P | 20 |
| Suchar 3 | 54°05’18’’ | 23°01’18’’ | 0.45 | 39 | 0.8 | | 0.2 | – | – | P | 34 |
| Suchar 4 | 54°05’22’’ | 23°01’19’’ | 1.04 | 44 | 0.8 | | 0.2 | – | – | P | 37 |
| Suchar 5 | 54°05’20’’ | 23°01’57’’ | 2.14 | 75 | 0.9 | | 0.1 | – | – | P | 46 |
| Suchar Wielki | 54°01’40’’ | 23°03’19’’ | 8.90 | 31 | 0.8 | | 0.2 | – | – | P | 27 |
| Szare | 53°55’30’’ | 16°42’07’’ | 8.30 | 2 | 0.6 | | 0.2 | 0.2 | 0.2 | O | 47 |
| Wielkie Gacno | 53°47’62’’ | 17°33’33’’ | 13.50 | 2 |  | | 0.8 | 0.1 | 0.1 | O | 5 |
| Wygoda | 54°31’36’’ | 18°14’37’’ | 10.60 | 5 | 0.6 | | 0.2 | 0.1 | 0.1 | M | 14 |
| Zakręt | 53°41’00’’ | 21°24’39’’ | 2.36 | 42 | 0.8 | | 0.2 | – | – | P | 14 |
| Żabie | 53°40’13’’ | 20°06’15’’ | 2.27 | 14 | 0.7 | | 0.2 | 0.1 | – | M–P | 23 |
| Żabie 2 | 53°50’00’’ | 15°02’00’’ | 1.78 | 70 | 0.8 | | 0.1 | 0.1 | – | P | 50 |
| Żabionek | 53°49’54’’ | 17°37’14’’ | 5.80 | 2 | 0.5 | | 0.1 | 0.3 | 0.1 | P | 14 |
