# Supplementary material for: Effect of changes in the fractal structure of a littoral zone in the course of lake succession on the abundance, body size sequence and biomass of beetles
Source: PeerJ. 2018 Sep 26;6:e5662. doi: 10.7717/peerj.5662 (PMC6163033; doi:10.7717/peerj.5662)
Supplement: Appendix S3 — Influence of significant interaction between habitats and Body size on (A) abundance of beetles, (B) number of species. SN, Subclass number; BS, Body size class (1-very small beetles, 2-small, 3-medium, 4-large, 5-very large); Habitat: Sphagnum, compacted Sphagnum mat; dense, dense macrophytes zone; sparse, sparse macrophytes zone, [file peerj-06-5662-s003.xlsx]

## Sheet: Appendix 3A,B
Appendix 3 Results of HSD Tuckey post hoc test for GLM repeated measure Anova. Influence of significant interaction between habitats and Body size on A) abundance of beetles, B) number of species. SN - Subclass number,
BS - Body size class (1-very small beetles, 2-small, 3-medium, 4-large, 5-very large), Habitat: Sphagnum – compacted Sphagnum mat, dense – dense macrophytes zone, sparse - sparse macrophytes zone, sandy – sandy bottom zone, pockets – pockes and ponds in Sphagnum mat. Values statistically significantion are in bold.
A	SN	habitats	BS	{1}	{2}	{3}	{4}	{5}	{6}	{7}	{8}	{9}	{10}	{11}	{12}	{13}	{14}	{15}	{16}	{17}	{18}	{19}	{20}	{21}	{22}	{23}	{24}	{25}
	1	sandy	BS 1
	2	sandy	BS 2	0.320913
	3	sandy	BS 3	1	0.04868
	4	sandy	BS 4	1	0.0935426	1
	5	sandy	BS 5	0.99999	0.00865605	1	1
	6	pockets	BS 1	1	0.145634	1	1	1
	7	pockets	BS 2	0.000995276	0.990514	5.05913e-05	0.000112671	2.0983e-05	1.87581e-05
	8	pockets	BS 3	1	0.14672	1	1	1	1	1.87581e-05
	9	pockets	BS 4	1	0.0852227	1	1	1	1	1.87581e-05	1
	10	pockets	BS 5	0.999992	0.0139355	1	1	1	0.999281	1.87581e-05	0.999236	0.999997
	11	sparse	BS 1	1	0.433818	1	1	0.999988	1	1.87581e-05	1	0.999853	0.780029
	12	sparse	BS 2	0.994589	0.999979	0.806294	0.908286	0.461648	0.00530451	1.9388e-05	0.00542694	0.00104773	2.22607e-05	0.0702025
	13	sparse	BS 3	1	0.0750178	1	1	1	1	1.87581e-05	1	1	1	0.998613	0.000117121
	14	sparse	BS 4	1	0.0399219	1	1	1	1	1.87581e-05	1	1	1	0.96556	2.82556e-05	1
	15	sparse	BS 5	0.999988	0.0124795	1	1	1	0.999231	1.87581e-05	0.999185	0.999995	1	0.586872	1.88772e-05	0.999995	1
	16	dense	BS 1	0.00127504	0.993821	6.20317e-05	0.00014458	2.18865e-05	1.87581e-05	1	1.87581e-05	1.87581e-05	1.87581e-05	1.87583e-05	0.00160492	1.87581e-05	1.87581e-05	1.87581e-05
	17	dense	BS 2	0.0590255	1	0.00496807	0.0111424	0.000683661	1.88107e-05	0.997258	1.88123e-05	1.87646e-05	1.87582e-05	2.5531e-05	0.303445	1.87621e-05	1.87585e-05	1.87582e-05	0.997958
	18	dense	BS 3	1	0.313241	1	1	0.999999	1	1.87582e-05	1	1	0.997578	1	0.447421	1	0.999991	0.996386	1.87582e-05	1.91146e-05
	19	dense	BS 4	1	0.0847888	1	1	1	1	1.87581e-05	1	1	1	0.999999	0.0622359	1	1	1	1.87581e-05	1.87592e-05	1
	20	dense	BS 5	0.999992	0.0135428	1	1	1	0.999995	1.87581e-05	0.999994	1	1	0.979964	0.00264882	1	1	1	1.87581e-05	1.87581e-05	0.995529	1
	21	Sphagnum	BS 1	0.290863	1	0.0452308	0.0856613	0.00846307	0.000183479	0.821643	0.000186859	5.82222e-05	1.91746e-05	0.00436451	0.967217	4.70839e-05	2.44312e-05	1.90756e-05	0.865886	1	0.00153761	5.76999e-05	1.91463e-05
	22	Sphagnum	BS 2	0.0539608	1	0.00442683	0.0100006	0.000605155	1.97996e-05	0.999472	1.98259e-05	1.89393e-05	1.87589e-05	8.05014e-05	0.442564	1.88791e-05	1.87753e-05	1.87587e-05	0.999794	1	3.49348e-05	1.89364e-05	1.87588e-05	1
	23	Sphagnum	BS 3	1	0.234756	1	1	1	1	1.87584e-05	1	1	0.999924	1	0.472866	1	1	0.999869	1.87585e-05	2.57039e-05	1	1	0.999913	0.000291711	2.03502e-05
	24	Sphagnum	BS 4	0.999999	0.0232671	1	1	1	1	1.87581e-05	1	1	1	0.998882	0.0239717	1	1	1	1.87581e-05	1.87627e-05	0.999936	1	1	1.91415e-05	1.87587e-05	0.999993
	25	Sphagnum	BS 5	0.999985	0.0117719	1	1	1	0.999997	1.87581e-05	0.999997	1	1	0.98932	0.00887008	1	1	1	1.87581e-05	1.87588e-05	0.998636	1	1	1.882e-05	1.87582e-05	0.999688	1
B	SN	habitats	BS	{1}	{2}	{3}	{4}	{5}	{6}	{7}	{8}	{9}	{10}	{11}	{12}	{13}	{14}	{15}	{16}	{17}	{18}	{19}	{20}	{21}	{22}	{23}	{24}	{25}
	1	sandy	Body size 1
	2	sandy	Body size 2	1.87581e-05
	3	sandy	Body size 3	1	1.87581e-05
	4	sandy	Body size 4	1	1.87581e-05	1
	5	sandy	Body size 5	0.999939	1.87581e-05	0.999726	0.999726
	6	pockets	Body size 1	0.999993	1.8763e-05	0.999999	0.999999	0.850913
	7	pockets	Body size 2	1.87581e-05	0.00149046	1.87581e-05	1.87581e-05	1.87581e-05	1.87581e-05
	8	pockets	Body size 3	0.97551	1.97549e-05	0.987732	0.987732	0.288478	0.992727	1.87581e-05
	9	pockets	Body size 4	0.999998	1.87608e-05	1	1	0.889073	1	1.87581e-05	0.975714
	10	pockets	Body size 5	0.999874	1.87581e-05	0.999555	0.999555	1	2.82642e-05	1.87581e-05	1.87582e-05	4.43935e-05
	11	sparse	Body size 1	1	1.87581e-05	1	1	0.999954	0.942207	1.87581e-05	0.0628035	0.975693	0.387876
	12	sparse	Body size 2	1.87581e-05	1	1.87582e-05	1.87582e-05	1.87581e-05	1.87581e-05	1.87581e-05	1.87581e-05	1.87581e-05	1.87581e-05	1.87581e-05
	13	sparse	Body size 3	1	1.87583e-05	1	1	0.980237	1	1.87581e-05	0.794387	1	0.00924828	0.999546	1.87581e-05
	14	sparse	Body size 4	1	1.87581e-05	1	1	0.999995	0.814328	1.87581e-05	0.0236219	0.895469	0.613232	1	1.87581e-05	0.99027
	15	sparse	Body size 5	0.99936	1.87581e-05	0.998147	0.998147	1	6.95621e-05	1.87581e-05	1.87602e-05	0.000135339	1	0.0463022	1.87581e-05	0.000106045	0.128898
	16	dense	Body size 1	1	1.8759e-05	1	1	0.943356	1	1.87581e-05	0.998401	1	0.0879375	0.999961	1.87581e-05	1	0.999365	0.0442872
	17	dense	Body size 2	1.87592e-05	1	1.87605e-05	1.87605e-05	1.87581e-05	1.87581e-05	1.87581e-05	1.87581e-05	1.87581e-05	1.87581e-05	1.87581e-05	0.999865	1.87581e-05	1.87581e-05	1.87581e-05	1.87581e-05
	18	dense	Body size 3	1	1.87583e-05	1	1	0.983703	1	1.87581e-05	0.977675	1	0.218995	1	1.87581e-05	1	0.999993	0.124701	1	1.87581e-05
	19	dense	Body size 4	1	1.87584e-05	1	1	0.978463	1	1.87581e-05	0.985616	1	0.185438	1	1.87581e-05	1	0.99998	0.1029	1	1.87581e-05	1
	20	dense	Body size 5	0.999842	1.87581e-05	0.999455	0.999455	1	0.0246967	1.87581e-05	0.000134026	0.0378322	1	0.848364	1.87581e-05	0.181978	0.940814	1	0.0202189	1.87581e-05	0.0722602	0.0569787
	21	Sphagnum	Body size 1	1.87862e-05	0.999782	1.88166e-05	1.88166e-05	1.87582e-05	1.87581e-05	1.87581e-05	1.87713e-05	1.87581e-05	1.87581e-05	1.87581e-05	0.98094	1.87581e-05	1.87581e-05	1.87581e-05	1.87581e-05	1	1.87581e-05	1.87581e-05	1.87581e-05
	22	Sphagnum	Body size 2	1.87581e-05	1	1.87581e-05	1.87581e-05	1.87581e-05	1.87581e-05	1.87648e-05	1.87581e-05	1.87581e-05	1.87581e-05	1.87581e-05	1	1.87581e-05	1.87581e-05	1.87581e-05	1.87581e-05	0.999896	1.87581e-05	1.87581e-05	1.87581e-05	0.902118
	23	Sphagnum	Body size 3	0.786807	3.69868e-05	0.849244	0.849244	0.0801105	0.98703	1.87581e-05	1	0.973167	4.39726e-05	0.163646	1.87581e-05	0.779054	0.0918078	2.68536e-05	0.917517	1.87793e-05	0.750247	0.791722	4.05194e-05	1.87737e-05	1.87581e-05
	24	Sphagnum	Body size 4	1	1.87581e-05	1	1	1	0.519392	1.87581e-05	0.0278419	0.60921	1	0.999951	1.87581e-05	0.912423	0.999998	0.999999	0.770029	1.87581e-05	0.927696	0.904742	1	1.87581e-05	1.87581e-05	0.000145202
	25	Sphagnum	Body size 5	0.998314	1.87581e-05	0.995671	0.995671	1	0.0238817	1.87581e-05	0.000196501	0.0354883	1	0.767153	1.87581e-05	0.156108	0.884728	1	0.072047	1.87581e-05	0.174501	0.148172	1	1.87581e-05	1.87581e-05	1.88073e-05	0.99993
